# Supplementary material for: Intracellular targeting of annexin A2 inhibits tumor cell adhesion, migration, and in vivo grafting
Source: PubMed Central journal article supplement (PMC5484684; doi:10.1038/s41598-017-03470-w), 2017-06-26
Supplement: 41598_2017_3470_MOESM1_ESM.pdf [file 41598_2017_3470_MOESM1_ESM.pdf]

# Intracellular targeting of annexin A2 inhibits tumor cell adhesion, migration, and *in vivo* grafting

Daniela I. Staquicini, Roberto Rangel, Liliana Guzman-Rojas, Fernanda I. Staquicini, Andrey S. Dobroff, Christy A. Tarleton, Michelle A. Ozbun, Mikhail G. Kolonin, Juri G. Gelovani, Serena Marchiò, Richard L. Sidman, Katherine A. Hajjar, Wadih Arap, Renata Pasqualini

## Supplementary information

**Table S1. Mass spectrometry analysis of protein candidates isolated from fraction F46.**

| Mass-spec retrieved peptides | Position on the protein (residues) | Protein name | Protein ID  |
|------------------------------|------------------------------------|--------------|-------------|
| GFSVADTPELQR                 | 96-109                             | LASP1        | NP_006139.1 |
| TQDQISNIK                    | 112-120                            |              |             |
| YHEEFEK                      | 122-128                            |              |             |
| FITHAPPGEFNEVFNDVR           | 20-37                              | CAPZA1       | NP_006126.1 |
| LLLNNNDNLLR                  | 38-47                              |              |             |
| EASDPQPEEADGGLK              | 103-118                            |              |             |
| FTITPPTAQVVGVLK              | 179-193                            |              |             |
| DVQDSLTVSNEAQTAK             | 211-238                            |              |             |
| QDIAFAYQR                    | 87-95                              | annexin A2   | AAH66955.2  |
| TPAQYDASELK                  | 123-133                            |              |             |
| TNQELQEINR                   | 154-163                            |              |             |
| RAEDGSVIDYELIDQDAR           | 197-214                            |              |             |

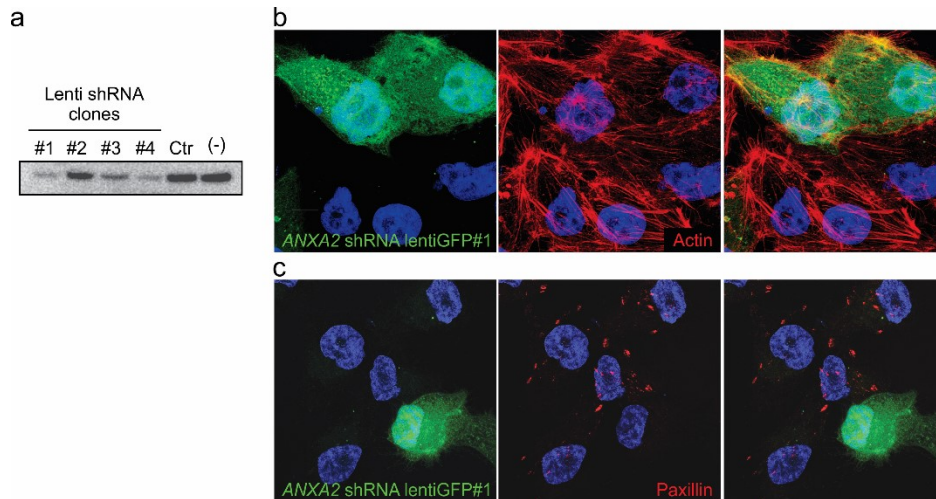

**Figure S1. Silencing of annexin A2 disrupts the organization of actin filaments and focal adhesions.** (a) The expression of annexin A2 was silenced in KS1767 cells by transduction with four alternative lentiviral shRNA (clones #1-4) against human annexin A2. A scrambled shRNA was used as a negative control (Ctr); (-), no lentivirus. GFP-positive (shRNA-transduced) cells were sorted and grown into 6-well plates to 80% confluence. Cells were lysed and protein extracts were separated by SDS-PAGE, blotted to nitrocellulose membranes and decorated with a specific anti-annexin A2 antibody. (b, c) Pools of cells infected with the best performing lentiviral shRNA clone (#1) were grown overnight onto circular coverslips coated with fibronectin and vitronectin, fixed and stained for IF and confocal imaging. Green, shRNA-transduced cells; (b) red: actin (rhodamine-phalloidin); (c), red: paxillin (Alexa 647 secondary antibody). Scale bar, 10  $\mu$ m.

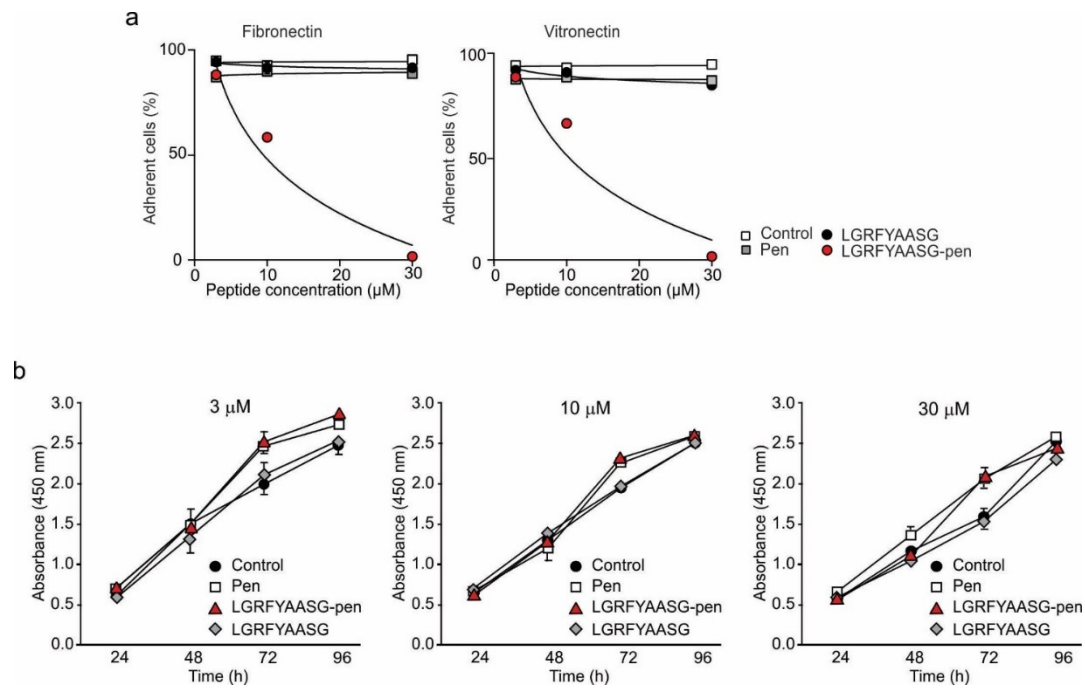

**Figure S2. Tumor cell migration and viability assays.** (a) KS1767 cells were exposed to increasing peptide concentrations (3-10-30  $\mu\text{M}$ ), followed by evaluation of cell adhesion to different matrix proteins (b) or proliferation at different time points by WST assay. Bars represent mean  $\pm$  SEM of triplicate experimental points.

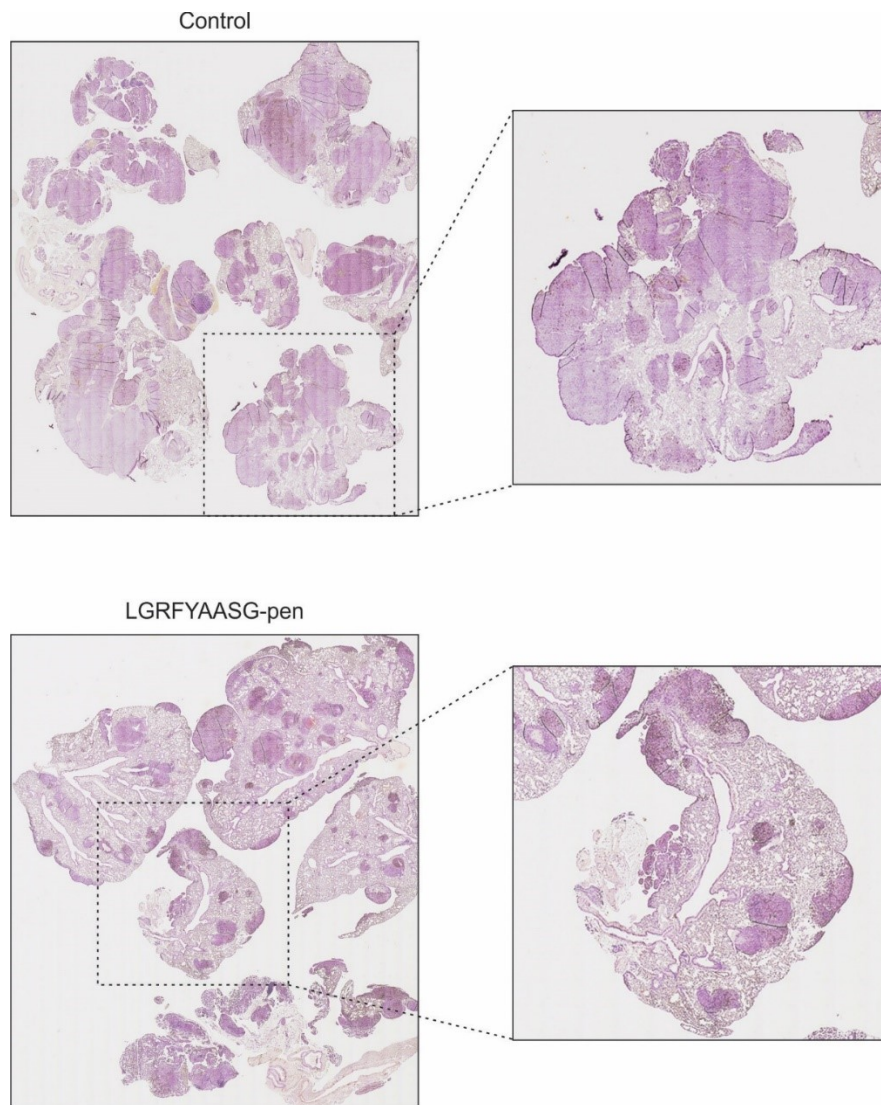

**Figure S3. Pathological analysis of lungs in tumor-bearing mice.** Representative histological analysis of tumor foci in lungs from animals administered with B16F10 cells. Slide sections were obtained from formalin-fixed and paraffin-embedded tissue (5- $\mu$ m slices) and stained with H&E.
